# Supplementary material
Source: Research Square preprint supplement (doi:10.21203/rs.3.rs-9384366/v1)
Supplement: Supplementary file 1 [file 3f927a09ec880312aab9e80f.docx]

| **Parameter** | **Status** | **Baseline** | **Follow-up** | **Total** | **p-value** |
| --- | --- | --- | --- | --- | --- |
| ESR | Normal | 4 (20.0%) | 1 (5.0%) | 5 (25.0%) | 0.0066 |
| Elevated | 10 (50.0%) | 5 (25.0%) | 15 (75.0%) |
| Total | 14 (70.0%) | 6 (30.0%) | 20 (100%) |
| CRP | Normal | 4 (20.0%) | 0 (0.0%) | 4 (20.0%) | 0.0003 |
| Elevated | 13 (65.0%) | 3 (15.0%) | 16 (80.0%) |
| Total | 17 (85.0%) | 3 (15.0%) | 20 (100%) |

# **Table-4** Changes in ESR and CRP (Baseline and follow-up):
