# Supplementary material
Source: Research Square preprint supplement (doi:10.21203/rs.3.rs-9384366/v1)
Supplement: Supplementary file 2 [file 527a5c1cc953fe10bcc2d7ec.docx]

**Table 2:** Comparison of patients with both baseline and follow up [68Ga]Gallium PET CT

| Baseline [68Ga]Gallium PET CT (n=32) | Follow up [68Ga] Gallium PET CT (n=21) | |
| --- | --- | --- |
| Positive | Negative |
| Positive (n=22) | 0 | 12 |
| Negative (n=10) | 0 | 9 |
