# Supplementary material
Source: Research Square preprint supplement (doi:10.21203/rs.3.rs-9384366/v1)
Supplement: Supplementary file 3 [file b58292b8040571dc521ed59e.docx]

**Table – 1:** Baseline imaging and laboratory characteristics

|  |  | **[68Ga]Gallium citrate PETCT** | |  |
| --- | --- | --- | --- | --- |
| **CT findings** | Category | **Negative**  **(n = 10)** | **Positive**  **(n = 22)** | **p-value#** |
| Paravertebral / soft tissue collection | Negative | 1 (10.00%) | 5 (22.73%) | 0.64 |
| Positive | 9 (90.00%) | 17 (77.27%) |  |
| Intervertebral disc involvement | Negative | 2 (20.00%) | 7 (31.82%) | 0.68 |
| Positive | 8 (80.00%) | 15 (68.18%) |  |
| Vertebral body involvement | Negative | 0 (0.00%) | 2 (9.09%) | - |
| Positive | 10 (100.00%) | 20 (90.91%) |  |
| **MRI findings*** |  |  |  |  |
| Abscess-Paravertebral | No | 5 (50.00%) | 15 (68.18%) | 0.44 |
| Yes | 5 (50.00%) | 7 (31.82%) |  |
| Abscess-Epidural | No | 6 (60.00%) | 19 (86.36%) | 0.17 |
| Yes | 4 (40.00%) | 3 (13.64%) |  |
| Abscess-Intraosseous | No | 9 (90.00%) | 21 (95.45%) | - |
| Yes | 1 (10.00%) | 1 (4.55%) |  |
| Abscess-Soft tissue | No | 9 (90.00%) | 18 (81.82%) | 1 |
| Yes | 1 (10.00%) | 4 (18.18%) |  |
| Marrow oedema | Negative | 4 (66.67%) | 6 (46.15%) | 0.63 |
| Positive | 2 (33.33%) | 7 (53.85%) |  |
| Vertebral destruction | Positive | 6 (100.00%) | 13 (100.00%) | - |
| Disc involved | Negative | 0 (0.00%) | 3 (23.08%) | 0.52 |
| Positive | 6 (100.00%) | 10 (76.92%) |  |
| **Laboratory parameters** |  |  |  |  |
| ESR | Normal | 3 (33.33%) | 5 (22.73%) | 0.66 |
| Elevated | 6 (66.67%) | 17 (77.27%) |  |
| CRP | Normal | 1 (11.11%) | 6 (27.27%) | 0.64 |
| Elevated | 8 (88.89%) | 16 (72.73%) |  |
| Total counts | Normal | 9 (90.00%) | 19 (86.36%) | 1 |
| Elevated | 1 (10.00%) | 3 (13.64%) |  |
| **Histopathology (n=20)** | Chronic spondylitis | 3 (42.86%) | 6 (46.15%) |  |
| Necrotising granulation spondylitis | 1 (14.29%) | 4 (30.77%) | 0.716 |
| Inflammatory granulation tissue and focal histiocytic aggregates | 3 (42.86%) | 3 (23.08%) |  |
| **Microbiology** |  |  |  |  |
| Mycobacterial culture (MGIT) | Negative | 5 (62.50%) | 12 (63.16%) | 1 |
| Positive | 3 (37.50%) | 7 (36.84%) |  |
| MTB XPERT | Negative | 4 (44.44%) | 4 (22.22%) | 0.18 |
| Positive | 5 (55.56%) | 14 (77.78%) |  |

# p values were calculated using Fisher’s exact test.
- Not calculated due to small cell counts.
ESR, erythrocyte sedimentation rate; CRP, C-reactive protein; MGIT, mycobacteria growth indicator tube.

*MRI subgroup numbers were less than the total cohort due to incomplete imaging data.
