# Supplementary material
Source: Research Square preprint supplement (doi:10.21203/rs.3.rs-9384366/v1)
Supplement: Supplementary file 4 [file ce079dfa138c1764b63c2df6.docx]

**Table 3:** Comparison of follow up [18F]FDG PET CT (n=17) with the baseline and follow up [68Ga]Gallium PET CT

| Follow up [18F]  FDG PET CT (n=17) | Baseline [68Ga] Gallium PET CT | | Follow up [68Ga] Gallium PET CT | |
| --- | --- | --- | --- | --- |
| Positive | Negative | Positive | Negative |
| Positive (n=13) | 6 | 7 | - | 13 |
| Negative (n=4) | 3 | 1 | - | 4 |
